# Supplementary material
Source: Springer Nature journal article supplement (https://www.springermedizin.de/resource/supplementary/12936_2009_1020_MOESM1_ESM.pdf/9548794)
Supplement: MOESM1 [file 9548794]

351 Children enrolled  
100 HIV-unexposed  
203 HIV-exposed  
48 HIV-infected

246 Children randomized  
86 HIV-unexposed  
131 HIV-exposed  
29 HIV-infected

122 Children randomized to receive  
artemether-lumefantrine

124 Children randomized to receive  
dihydroartemisinin-piperaquine

412 Treatments with artemether-  
lumefantrine for uncomplicated  
falciparum malaria

425 Treatments with dihydroartemisinin-  
piperaquine for uncomplicated  
falciparum malaria
